# Supplementary material
Source: Springer Nature journal article supplement (https://www.springermedizin.de/resource/supplementary/12936_2010_2040_MOESM1_ESM.pdf/9543382)

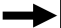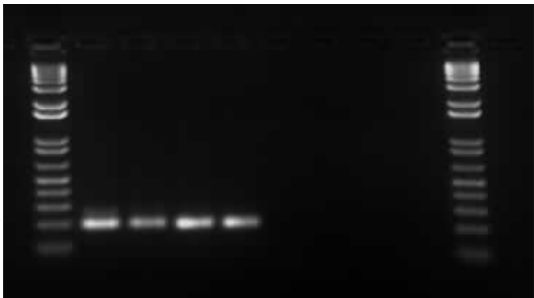

Blank  
SDS  
Seq  
Seq  
0.50  
0.50  
0.50  
0.50  
+

Supplement: MOESM1 [file 9543382]
